# Supplementary material for: Spinneret geometry modulates the mechanical properties of man-made cellulose fibers
Source: Springer Nature journal article supplement (doi:10.1007/s10570-021-04220-y), 2021-10-07
Supplement: MOESM1 [file 19738900]

*Supplementary Materials*

of

**Spinneret geometry modulates the mechanical properties of man-made cellulose fibers**

Kaniz Moriam[a], Daisuke Sawada[a], Kaarlo Nieminen[a], Yibo Ma[a], Marja Rissanen[a], Nicole Nygren[a], Chamseddine Guizani[a], Michael Hummel[a], Herbert Sixta[a]*

*corresponding author

*[a] Department of Bioproducts and Biosystems*

*School of Chemical Engineering*

*Aalto University
 P.O Box 16300, Espoo, FI-00076 Aalto, Finland
 Emails:* [*most.moriam@aalto.fi*](mailto:most.moriam@aalto.fi) *;* [*daisuke.sawada@aalto.fi*](mailto:daisuke.sawada@aalto.fi) *;* [*kaarlo.nieminen@aalto.fi*](mailto:kaarlo.nieminen@aalto.fi) *;*

[*yibo.ma@aalto.fi*](mailto:yibo.ma@aalto.fi)*;* [*marja.rissanen@aalto.fi*](mailto:marja.rissanen@aalto.fi)*;* [*nicole.nygren@aalto.fi*](mailto:nicole.nygren@aalto.fi) *;*[*chamseddine.guizani@aalto.fi*](mailto:chamseddine.guizani@aalto.fi)*;*

[*michael.hummel@aalto.fi*](mailto:michael.hummel@aalto.fi)

*Corresponding Author’s E-mail:* [*herbert.sixta@aalto.fi*](mailto:herbert.sixta@aalto.fi)

**Table of contents**

Spinneret geometries……………………………………………………………………………………………S2

Numerical simulation data………………………………………………………………………………………S2

Spinnabilities of cellulose solutions…………………………………………………………………………… S4

Spinning parameters…………………………………………………………………………………………… S4

Contour plots……………………………………………………………………………………………………S5

Fiber morphologies……………………………………………………………………………………………...S6

Mechanical properties of fibers…………………………………………………………………………………S7

Number of pages: 09

Number of tables: 03

Number of figures: 08

**Spinneret geometries**


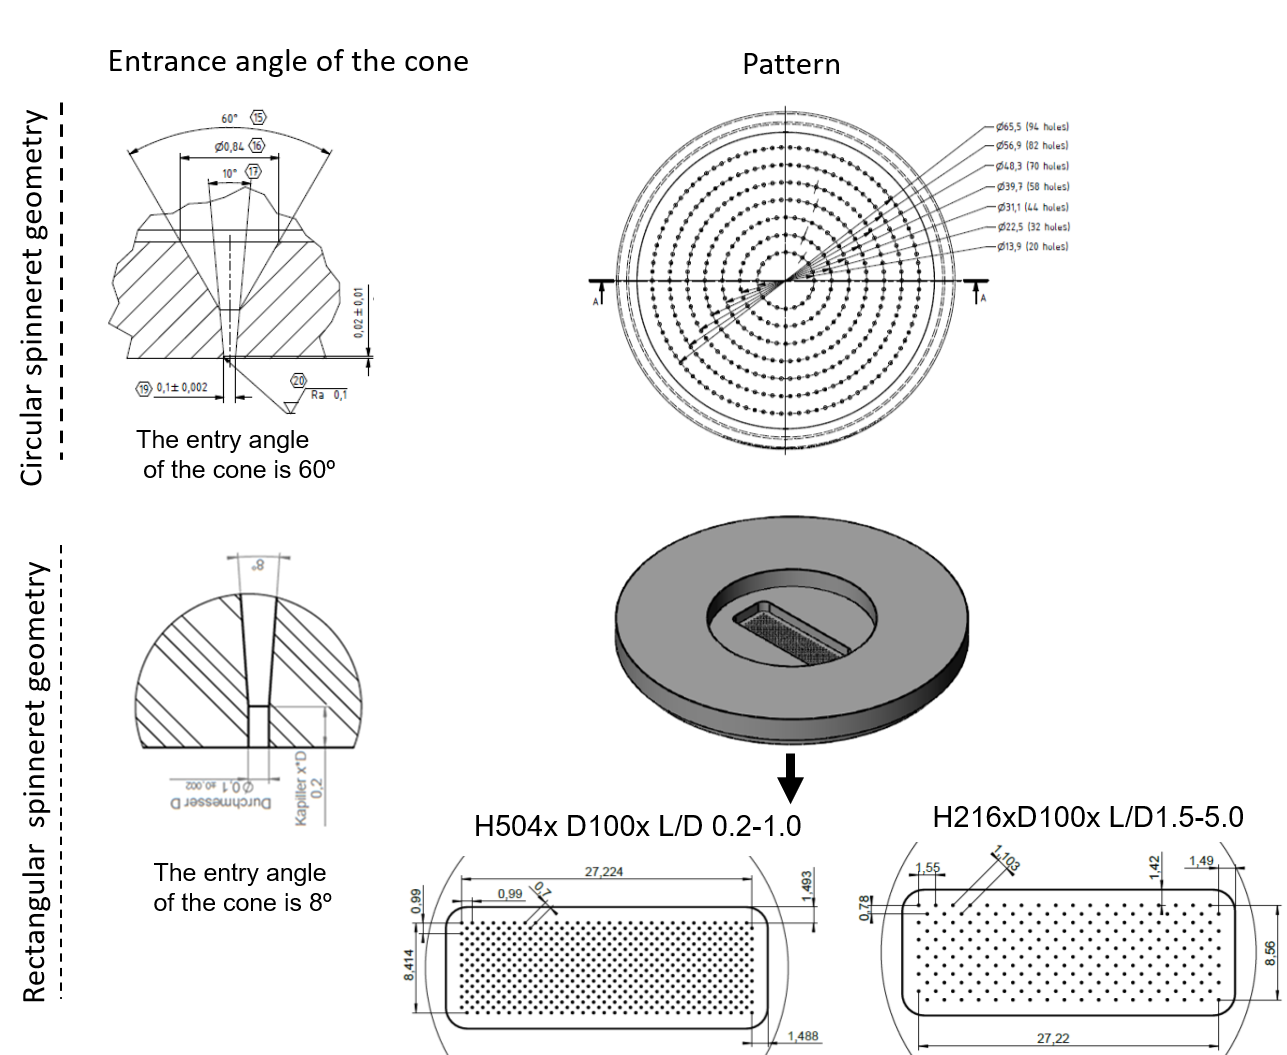


**Fig. S1** The circular and rectangular geometries of the spinnerets

**Numerical simulation data**


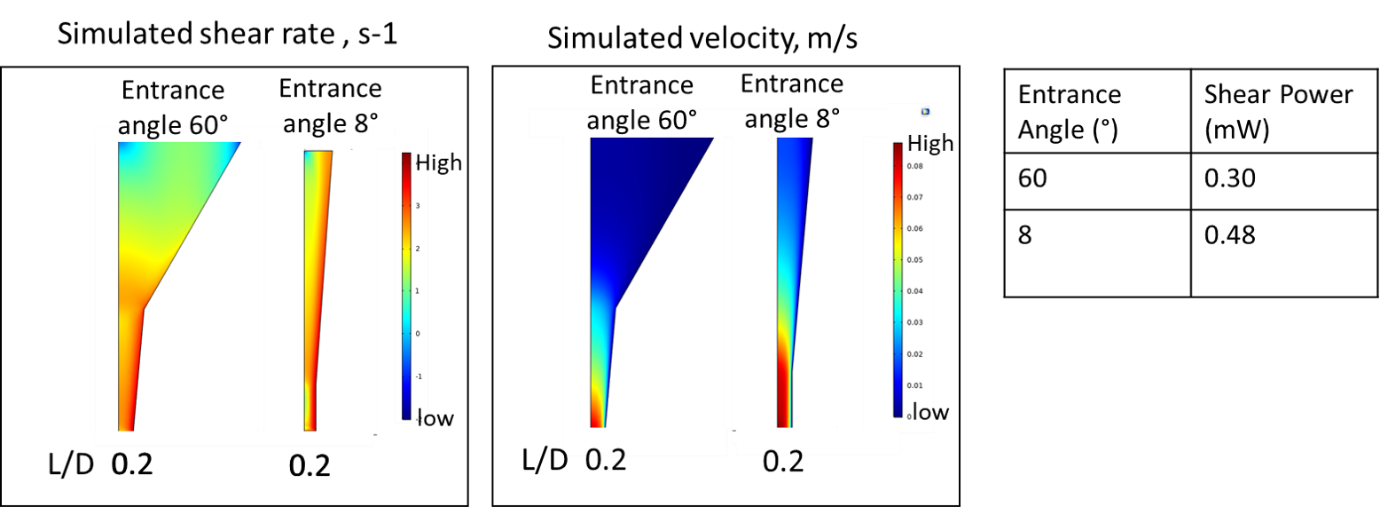


**Fig. S2** The simulated shear rate and velocity as well as the shear power of cellulose solution inside the D100 spinneret capillary having entrance angle 8°and 60°.


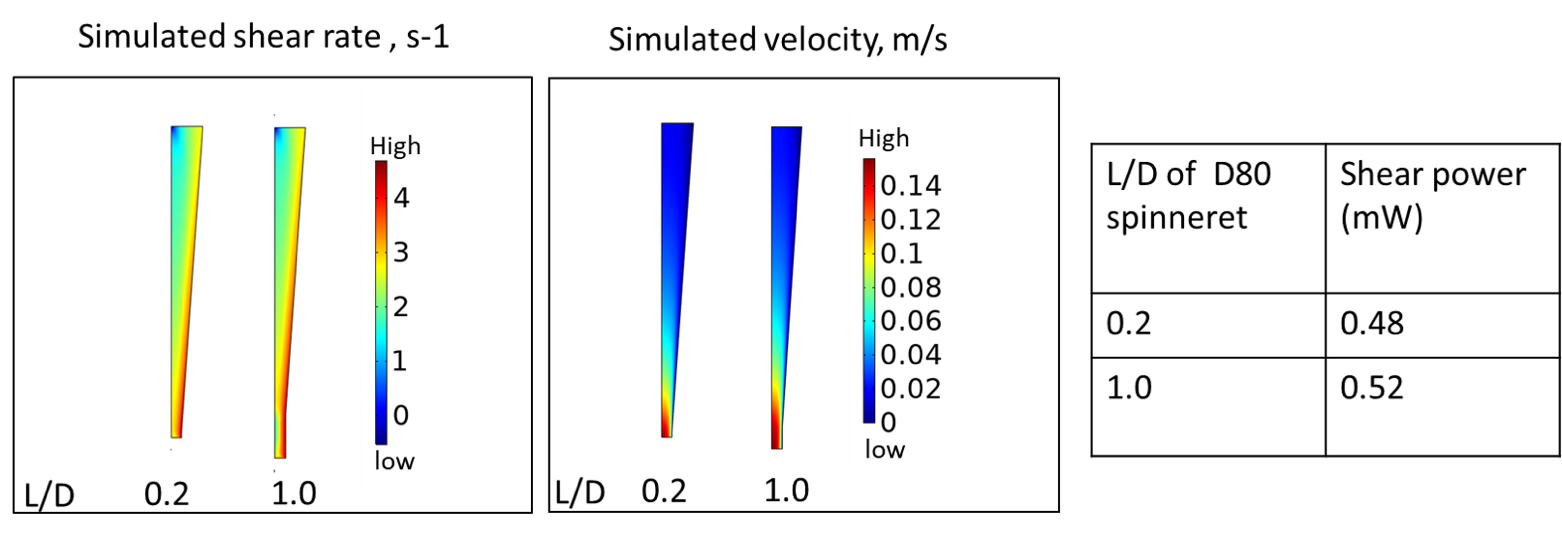


**Fig. S3** The simulated shear rate and velocity as well as the shear power of cellulose solution inside the spinneret capillary having diameter 80 micrometer (L/D 0.2 and 1.0). Pulp and solvent: 13 wt% STG in [DBNH][OAc].


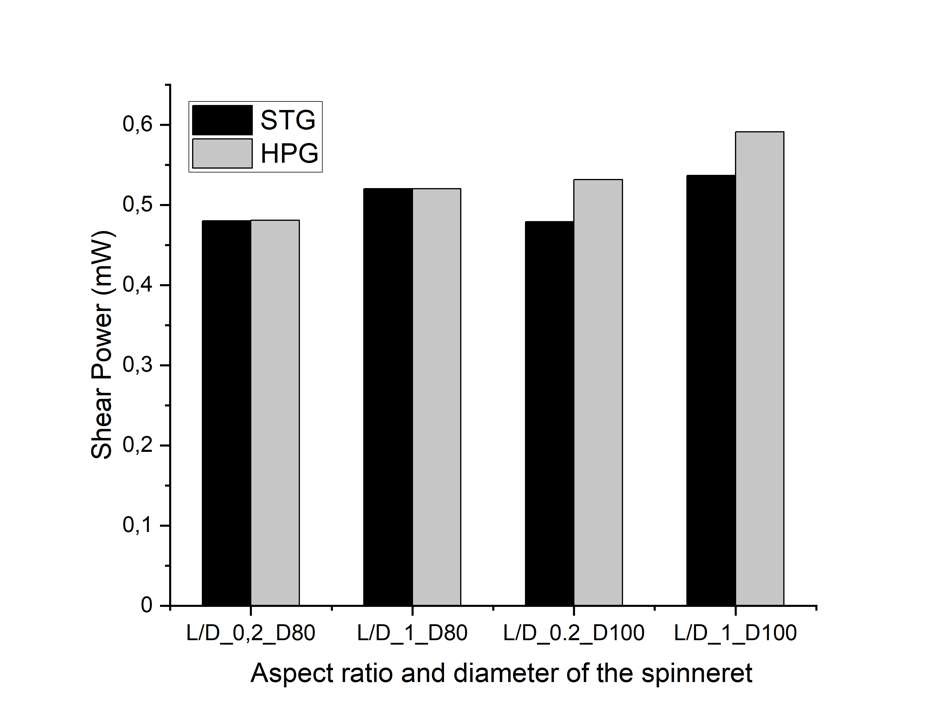


**Fig. S4** the shear power of STG and HPG solutions inside the D100 (L/D 0.2 and 1.0) and D80 (L/D 0.2 and 1.0) spinnerets. Pulp concentration in solvent: 13 wt% in [DBNH][OAc].

**Spinnabilities of cellulose solutions**

**Table S1** The spinnabilities of the cellulose solution using different spinneret geometries.

| Spinnability | Draw ratio  (100 µm hole containing spinnerets) | Draw ratio  (80 µm hole containing spinnerets) | Minimum Titer achieved (dtex) | Spinnerets |
| --- | --- | --- | --- | --- |
| Excellent | >14-18 | >8 | T<1 | 216x100x1.5; 216x100x2.0; 216x100x4.0; 216x100x5.0; 504x100x1.0; 216x80x0.2; 216x80x1.0;  504x80x1.0 |
| Good | 8-14 | 6-8 | 1.8- 1.2 | 400x100x0.2;  504x100x0.2 |
| Poor | 2-8 | <5 | >2 |  |

**Spinning parameters**

**Table S2** Process parameters during spinning with STG pulp (13 wt% cellulose concentration) using different spinneret geometries

| No of holes | hole density  (holes/cm2) | hole distribution &  entrance angle | Hole diameter  (µm) | L/D | Spinning pressure  (bar) | Spinning  temperature  °C | Zero shear Viscosity  Pa.s | Angular frequency at COP, s-1 | G’=G’’ (COP)  Pa | Extrusion velocity  m/min |
| --- | --- | --- | --- | --- | --- | --- | --- | --- | --- | --- |
| H216 | 95 | Rectangular geometry.  *entrance angle: 8°* | 100 | 1.5 | 50 | 75 | 34000 | 0.57 | 3736 | 6.5 |
| H216 | 100 | 2 | 50-59 | 70-72 | 33000 | 0,71 | 4306 | 6.5/6.8 |
| H216 | 100 | 4 | 60-64 | 75 | 34000 | 0.84 | 4065 | 4.3 |
| H216 | 100 | 5 | 59-60 | 76-77 | 24500 | 0.77 | 4197 | 4.3/4.7 |
| H504 | 221 | 100 | 0.2 | 50-54 | 68-70 | 33000 | 0.36 | 4036 | 4.8 |
| H504 | 100 | 1 | 60-63 | 63-65 | 48000 | 0.40 | 4378 | 4.8/4.3 |
| *H216* | *95* | *80* | *0.2* | *65-67* | *77-78* | *25000* | *0,68* | *3968* | *6.5/5.9* |
| *H216* | *80* | *1* | *64-65* | *75-80* | *21000* | *1* | *4066* | *7.5* |
| *H504* | *80* | *1* | *64-65* | *75-80* | *21000* | *0.83* | *4050* | *6.5/5.9* |
| H200 | 58 | Circular geometry  *entrance angle:60°* | 100 | 0.2 | 30-32 | 75 | 34000 | 0.90 | 3828 | 4.8 |

**Contour plots**

The calculation and visualization of XYZ Contour plots were performed by the Origin Software. Delaunay Triangulation was used to compute and draw the contour lines.

L/D ratio of the spinnerets: effect on toughness and tenacity


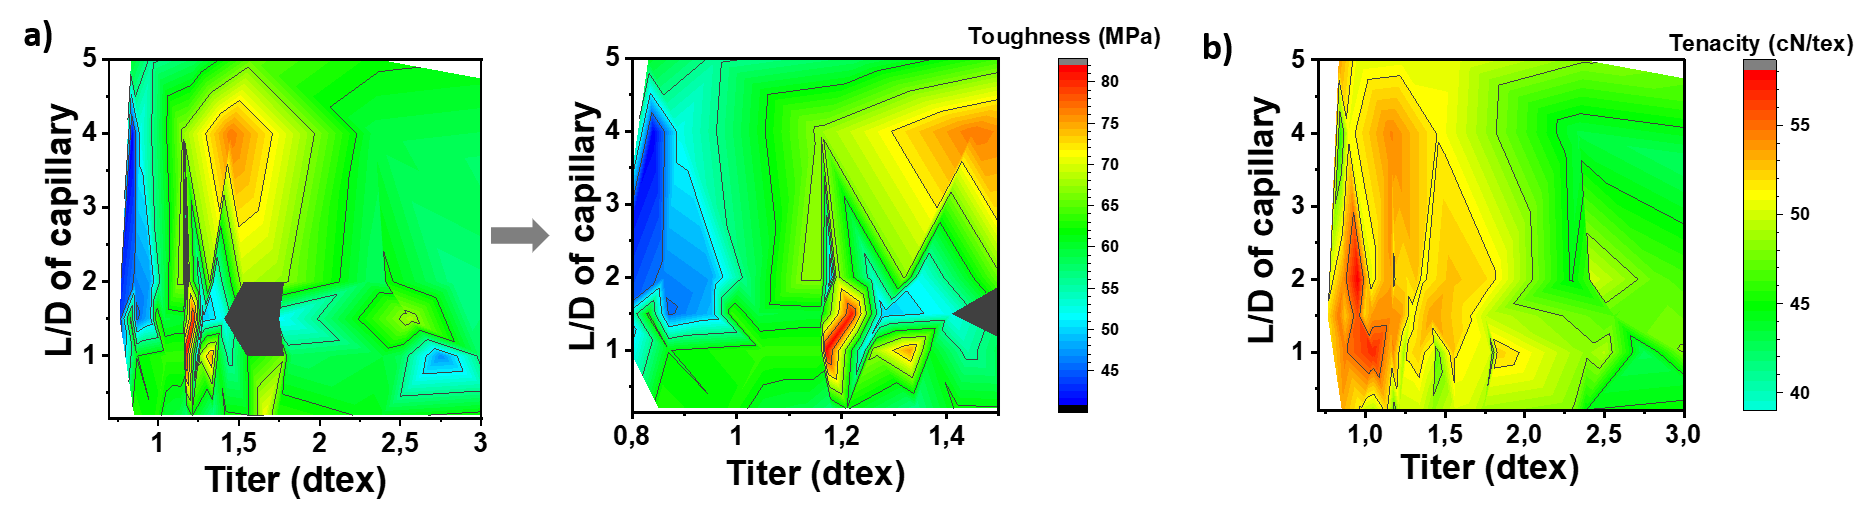


**Fig. S5** The contour plot presenting the effect of L/D ratio of different spinnerets to achieve a) highest toughness and b) highest tenacity at certain titer. Pulp and solvent: 13 wt% STG in [DBNH][OAc].

Hole diameter of the spinnerets: effect on tenacity


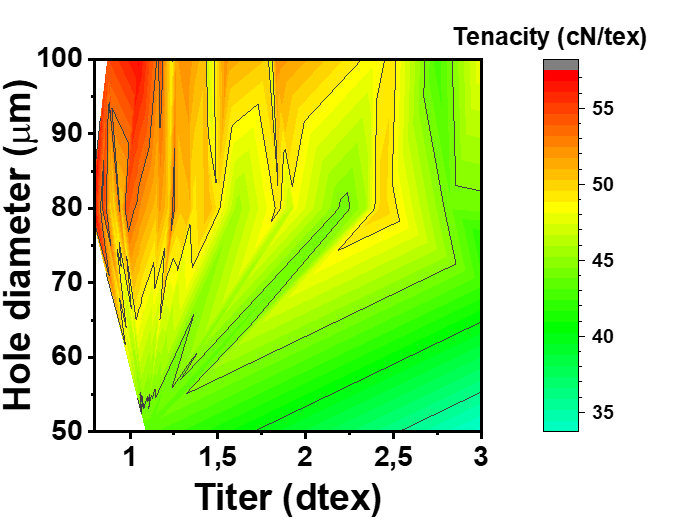


**Fig. S6** The effect of spinneret hole diameter in achieving highest toughness. Pulp and solvent: 13 wt% STG in [DBNH][OAc]

**Fiber morphologies**

**
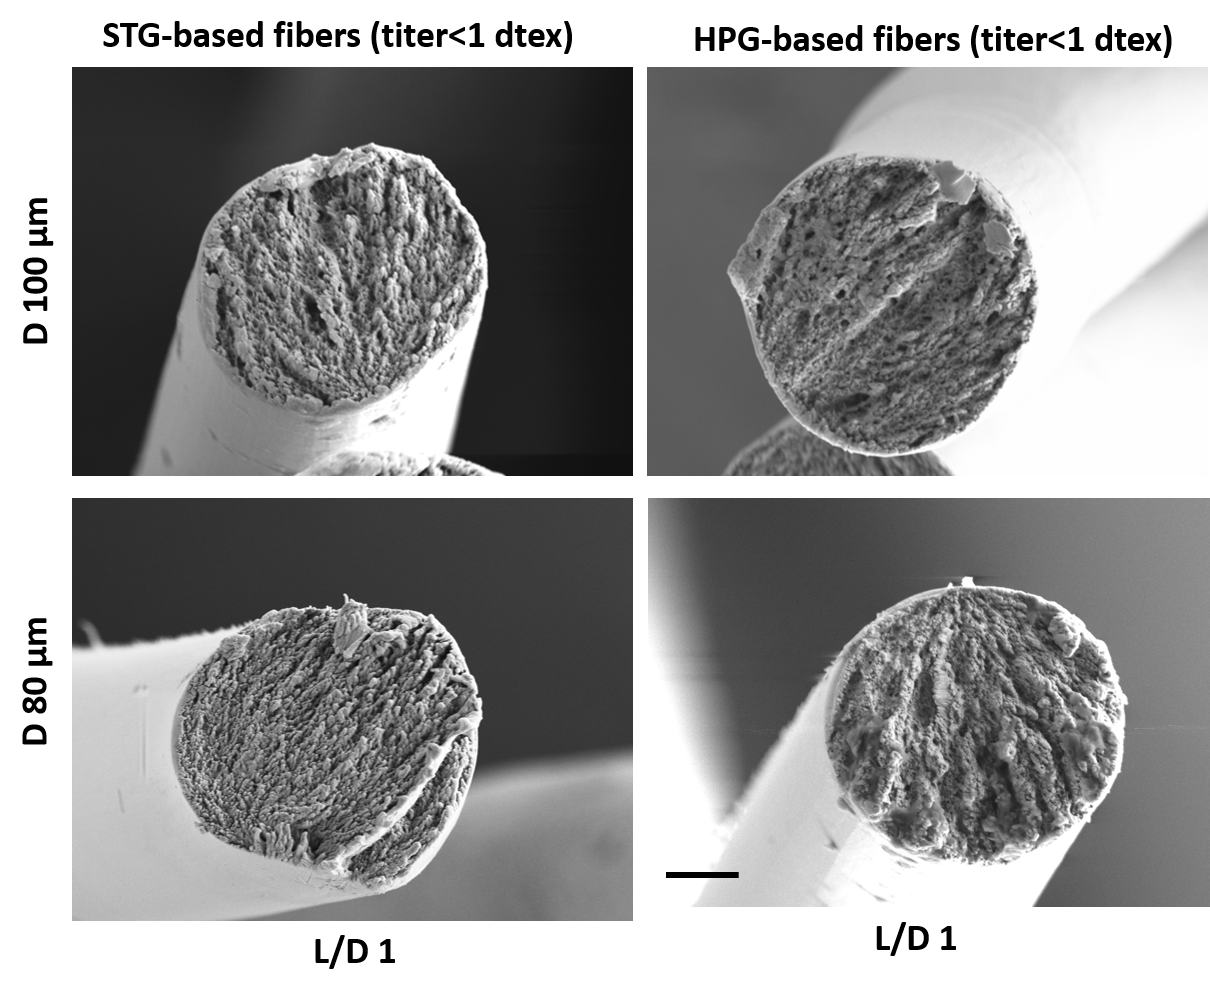
**

**Fig. S7** The morphologies of the micro-fiber fiber cross section of the STG and HPG based fiber prodced using D100 and D80 spinnerets having L/D 1. Pulp concentration in solvent: 13 wt% in [DBNH][OAc]

**Mechanical Properties of the fibers**

**Fig. S8** Elastic modulus vs linear density for various spinnerets: 504x100x0.2; 504x100x1.0; 216x80x0.2; 216x80x1.0; 504x80x1.0. Pulp and solvent: 13 wt% STG in [DBNH][OAc]

**Table S3** Mechanical properties of the fibers in condition state spun using different spinneret geometries and different pulps

| Spinneret name/ pulp/solvent | DR | Fiber properties in cond. state | | | | | CRI (%) | CW(Å) |
| --- | --- | --- | --- | --- | --- | --- | --- | --- |
| Linear density (dtex) | Tenacity (cN/tex) | Elongation (%) | elastic modulus (GPa) | Toughness (MPa) |  |  |
| D216x100x1.5 | 6 | 2.56±0.47 | 46.82± 2.53 | 15.07±1.93 | 20.02±2.71 | 67.96±10.65 |  |  |
| STG 13 wt%in [DBNH][OAc] | 8 | 1.75±0.19 | 49.71± 3.38 | 11.65±1.55 | 20.42±3.47 | 51.46±9.80 | 35.6 | 34.6 |
|  | 12 | 1.19±0.09 | 53.80± 2.83 | 13.82±1.37 | 22.20±2.89 | **70.35±10.76** | 35.3 | 34.6 |
|  | 15 | 0.97±0.07 | 53.99± 3.41 | 10.95±1.37 | 24.61±2.87 | 56.21±8.96 |  |  |
|  | 18 | 0.80±0.07 | 53.26±4.16 | 10.94±1.27 | 25.74±2.50 | 52.66±10.17 |  |  |
|  |  |  |  |  |  |  |  |  |
| H216xD100x2 | 4 | 4.57±0.55 | 41.90± 2.71 | 14.09±1.40 | 15.37±4.28 | 54.69±9.86 |  |  |
| STG 13 wt%in [DBNH][OAc] | 6 | 2.37±0.24 | 46.98± 3.75 | 12.73±1.64 | 19.04±2.59 | 59.62±11.62 |  |  |
|  | 8 | 1.57±0.20 | 51.46± 3.53 | 12.94±1.66 | 20.41±2.94 | 59.56±10.69 | 34 | 34.3 |
|  | 10 | 1.40±0.14 | 52.29±3.64 | 12.82±1.38 | 19.41±3.54 | 61.40±10.62 |  |  |
|  | 12 | 1.16±0.11 | 52.56±3.65 | 13.55±1.75 | 22.62±2.87 | **66.87**±11.41 | 36.7 | 36.2 |
|  | 15 | 0.98±0.09 | 55.26± 2.43 | 11.10±1.26 | 20.79±2.32 | 52.00±8.27 |  |  |
|  | 18 | 0.86±0.07 | 53.97± 4.50 | 9.89±1.30 | 25.12±3.48 | 46.57±10.91 |  |  |
|  |  |  |  |  |  |  |  |  |
| H216xD100x4 | 6 | 2.34±0.38 | 43.33±3.34 | 14.46±1.49 | 18.49±3.15 | 59.21±8.82 |  |  |
| STG 13 wt%in [DBNH][OAc] | 9 | 1.45±0.21 | 51.26±3.73 | 16.09±1.62 | 16.35±4.93 | **76.78**±11.83 | 35 | 34.2 |
|  | 12 | 1.16±0.10 | 54.28±2.43 | 11.94±1.60 | 22.22±4.89 | **67.29**±10.20 | 34 | 33.4 |
|  | 18 | 0.84±0.16 | 45.56±8.81 | 10.17±1.29 | 19.97±4.41 | 40.98±1332 |  |  |
|  |  |  |  |  |  |  |  |  |
| H216xD100x5 | 6 | 2.37±0.14 | 48.12±2.76 | 14.11±1.57 | 15.64±4.15 | 61.84±9.99 |  |  |
| STG 13 wt%in [DBNH][OAc] | 9 | 1.57±0.09 | 50.42± 2.63 | 14.04±1.34 | 20.49±3.19 | 65.36±9.61 | 34 | 34.3 |
|  | 12 | 1.23±0.14 | 50.55± 3.57 | 13.07±1.43 | 16.62±4.52 | **58.22**±10.83 | 34 | 33.4 |
|  | 15 | 0.96±0.09 | 50.28± 5.02 | 12.55±1.69 | 18.06±5.67 | 55.65± 11.55 |  |  |
|  | 18 | 0.83±0.08 | 53.61± 2.86 | 12.65±1.28 | 20.09±4.20 | 60.21±8.63 |  |  |
|  |  |  |  |  |  |  |  |  |
| H504XD100x0.2 | 6 | 2.38±0.19 | 44.64± 4.43 | 14.17±2.39 | 18.80±3.43 | 60.66±17.56 |  |  |
| STG 13 wt%in [DBNH][OAc] | 9 | 1.66±0.14 | 50.04± 3.50 | 14.88±1.52 | 21.04±3.31 | 70.82±10.95 | 34 | 34.3 |
|  | 10 | 1.42±0.09 | 48.38± 3.46 | 13.93±2.03 | 18.42±4.29 | 61.80±12.72 |  |  |
|  | 12 | 1.21±0.09 | 50.94± 2.36 | 14.47±1.74 | 19.49±5.18 | **68.46**±10.83 | 36 | 35.3 |
|  | 13 | 1.05±0.09 | 49.08± 5.76 | 12.95±2.76 | 22.65±2.98 | 59.96±18.02 |  |  |
|  |  |  |  |  |  |  |  |  |
| H504XD100x1 | 4 | 2.88±0.34 | 45.39± 5.53 | 12.89±2.02 | 15.02±2.95 | 52.19±13.60 |  |  |
| STG 13 wt%in [DBNH][OAc] | 6 | 2.45±0.21 | 48.80± 3.42 | 13.32±1.56 | 14.78±3.37 | 59.05±11.16 |  |  |
|  | 8 | 1.80±0.14 | 49.81± 3.38 | 13.99±1.68 | 16.37±4.06 | 61.58±11.92 |  |  |
|  | 10 | 1.44±0.13 | 51.46± 3.58 | 13.74±1.43 | 19.84±2.6 | 64.35±11.44 |  |  |
|  | 12 | 1.27±0.12 | 52.80± 2.57 | 14.80±1.32 | 20.57±4.02 | **71.46±8.83** | 36 | 36 |
|  | 17 | 0.87±0.10 | 54.54± 2.94 | 12.68±1.48 | 21.12±4.34 | 61.34±10.50 |  |  |
|  |  |  |  |  |  |  |  |  |
| H216xD80x0.2 | 4 | 2.67±0.37 | 45.74±4.03 | 14.43±1.69 | 19.08±3.84 | 58.30±10.68 |  |  |
| STG 13 wt%in [DBNH][OAc] | 6 | 1.54±0.20 | 50.04±4.20 | 12.16±1.85 | 20.28±3.53 | 59.89±14.29 |  |  |
|  | 9 | 1.03±0.15 | 51.34± 3.90 | 13.91±1.75 | 19.15±4.18 | **64.96**±9.53 | 35.6 | 35.2 |
|  | 10.4 | 0.91±0.12 | 50.22± 6.26 | 12.69±2.66 | 19.92±4.26 | 58.98±7.95 | 36.1 | 36.4 |
|  | 12 | 0.78±0.07 | 50.87± 7.52 | 11.24±2.74 | 20.27±3.91 | 54.32±11.10 |  |  |
|  |  |  |  |  |  |  |  |  |
| H216xD80x1 | 4 | 2.31±0.27 | 46.38± 4.27 | 13.28±1.82 | 17.31±3.86 | 59.47±10.65 |  |  |
| STG 13 wt%in [DBNH][OAc] | 5 | 1.89±0.21 | 47.55± 3.16 | 12.93±1.50 | 18.4±2.98 | 56.52±10.09 |  |  |
|  | 7 | 1.33±0.13 | 49.85± 3.09 | 12.04±1.38 | 18.83±4.57 | 53.04±9.61 |  |  |
|  | 7.5 | 1.25±0.12 | 51.54± 3.21 | 12.21±1.23 | 20.36±4.04 | **56.74±9.07** | 35.6 | 35.6 |
|  | 9 | 1.02±0.11 | 53.27± 4.02 | 12.68±1.45 | 21.16±3.55 | 61.61±11.30 |  |  |
|  | 12 | 0.80±0.10 | 55.31± 4.78 | 10.52±1.33 | 23.38±4.92 | 51.19±10.77 |  |  |
|  |  |  |  |  |  |  |  |  |
| H504xD80x1 | 4 | 2.39±0.23 | 47.96± 2.70 | 13.75±1.34 | 15.00±3.84 | 56.75±9.39 |  |  |
| STG 13 wt%in [DBNH][OAc] | 5 | 1.94±0.17 | 48.27± 3.40 | 12.32±1.27 | 19.95±3.16 | 59.07±11.61 |  |  |
|  | 6 | 1.61±0.10 | 45.55± 7.16 | 10.79±2.23 | 17.93±4.70 | 44.50±15.67 |  |  |
|  | 7 | 1.30±0.12 | 51.15± 3.71 | 12.07±1.21 | 20.50±4.07 | 55.93±9.90 |  |  |
|  | 7.5 | 1.20±0.10 | 51.94± 3.50 | 13.29±1.47 | 20.26±4.03 | **61.92±9.75** | 35 | 34.8 |
|  | 9 | 1.02±0.10 | 53.29± 2.64 | 11.75±1.46 | 22.42±3.33 | 56.30±9.83 | 35 | 35 |
|  | 10 | 0.95±0.09 | 52.69± 5.03 | 11.31±1.66 | 21.91±3.78 | 53.27±11.85 |  |  |
|  | 12 | 0.78±0.06 | 53.87± 2.95 | 13.27±1.17 | 18.62±5.34 | 63.42±9.16 |  |  |
|  |  |  |  |  |  |  |  |  |
| Spinneret name/pulp | DR | Linear density (dtex) | Tenacity (cN/tex) | Elongation (%) | elastic modulus (GPa) | Toughness (MPa) |  |  |
| H504XD100x1 | 4 | 2.33±0.2 | 54.29±3.31 | 11.83±1.11 | 23.39±2.15 | 58.53±9.41 |  |  |
| HPG 13 wt%in [DBNH][OAc] | 8 | 1.75±0.18 | 58.62±3.49 | 13.86±1.32 | 24.68±2.4 | 75.36±12.24 |  |  |
|  | 9 | 1.71±0.18 | 59.00±1.38 | 15.48±0.77 | 16.77±6.16 | 79.95±6.09 |  |  |
|  | 10 | 1.47±0.16 | 59.60±2.38 | 14.82±0.89 | 25.26±3.92 | 80.62±6.8 |  |  |
|  | 10.5 | 1.35±0.07 | 60.29±2.29 | 16.44±1.11 | 24.65±3.17 | **93.4±9.01** | 36.1 | 36.4 |
|  | 11 | 1.33±0.14 | 57.79±2.38 | 14.24±1.09 | 24.05±2.36 | 77.24±6.88 |  |  |
|  | 12 | 1.22±0.12 | 55.46±4.94 | 13.63±1.94 | 23.99±1.57 | 72.86±11.17 | 35.7 | 34.5 |
|  |  |  |  |  |  |  |  |  |
| H216XD80x1 | 4 | 2.12±0.22 | 56.58±2.62 | 13.04±0.72 | 15.62±4.64 | 64.31±6.25 |  |  |
| HPG 13 wt%in [DBNH][OAc] | 5 | 1.72±0.17 | 55.31±5.65 | 11.83±1.99 | 23.22±3.06 | 66.27±10.94 |  |  |
|  | 6 | 1.41±0.15 | 57.21±3.86 | 12.9±1.71 | 23.42±2.5 | 67.43±14.58 |  |  |
|  | 6.5 | 1.42±0.14 | 57.28±5.8 | 12.56±2.43 | 24.35±2.39 | 75.24±16.82 |  |  |
|  | 7 | 1.27±0.11 | 61.21±1.49 | 14.47±1.01 | 26.72±2.24 | **82.73±8.09** | 36 | 35.8 |
|  | 7.5 | 1.17±0.08 | 63.37±2.6 | 11.66±0.64 | 25.35±3.73 | 67.77±3.96 |  |  |
|  | 8 | 1.2±0.09 | 55.88±6.06 | 11.27±2.09 | 23.9±2.45 | 57.57±16.42 | 36 | 36 |

**Rheology measurement of 15 wt% HPG- and STG-cellulose solution**

**Table S4** Rheological properties of 15 wt% HPG- and STG-cellulose solution at spinning temperature

| Pulp | Pulp consistency | Spinning temperature (°C) | Zero shear viscosity  (Pa s) | Dynamic modulus at COP (Pa) | Angular frequency at COP (s-1) |
| --- | --- | --- | --- | --- | --- |
| STG | 15 | 77 | 55000 | 4180 | 0.53 |
| HPG | 15 | 80 | 80000 | 5030 | 0.28 |
